# Supplementary material for: Design, Synthesis, and Characterization of Tracers and Development of a Fluorescence Polarization Immunoassay for Rapid Screening of 4,4′-Dinitrocarbanilide in Chicken Muscle
Source: MDPI journal article supplement (doi:10.3390/foods10081822), 2021-08-06
Supplement: s1 [file s1]

Supporting Information for *Foods*

**Design, synthesis and characterization of tracers  
and development of a fluorescence polarization  
immunoassay for rapid screening of 4, 4' -  
dinitrocarbanilide in chicken muscle**

**Authors:** Qidi Zhang <sup>1, †</sup>, Ming Zou <sup>1, †</sup>, Wanyu Wang <sup>1</sup>, Jinyan Li <sup>1</sup>, Xiao Liang <sup>1, 2, \*</sup>

aInstitution and address:

1 College of Veterinary Medicine, Qingdao Agricultural University, No. 700 Changcheng Road, Qingdao 266109, People's Republic of China

bInstitution and address:

2 Basic Medical College, Qingdao University, No. 308 Ningxia road, Qingdao 266071, People's Republic of China

Correspondence: Xiao Liang Ph.D. College of Veterinary Medicine, Qingdao Agricultural University, No. 700 Changcheng Road, Qingdao 266109, People's Republic of China. Tel: +8613964867357; E-mail: liangxiao4000@163.com

†Co-author: Qidi Zhang and Ming Zou contributed equally to this work.

## Contents

**Figure S1.** The chemical structures of DNC and HDP.

**Figure S2.** Schematic illustrations of the FPIA .

**Figure S3.** The results of TLC for 25 tracers. (The red clip represents the target band that binds to the antibody).

**Figure S4.** (A) Mass spectrum of EDF with molecular ion peak  $[M+2H]^{2+}$  (m/z) of 450.00; (B) Mass spectrum of BDF with molecular ion peak  $[M+2H]^{2+}$  (m/z) of 478.03; (C) Mass spectrum of HDF with molecular ion peak  $[M+2H]^{2+}$  (m/z) of 506.06.

**Figure S5.** Comparison of the effect of homologous and heterologous tracers on sensitivity.

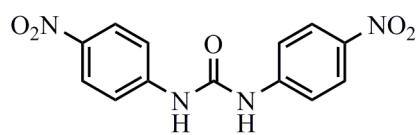

4, 4'- dinitro carbanilide  
(DNC)

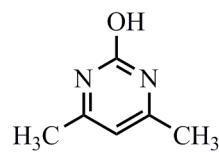

2-hydroxy- 4, 6- dimethyl pyrimidine  
(HDP)

**Figure S1.** The chemical structures of DNC and HDP.

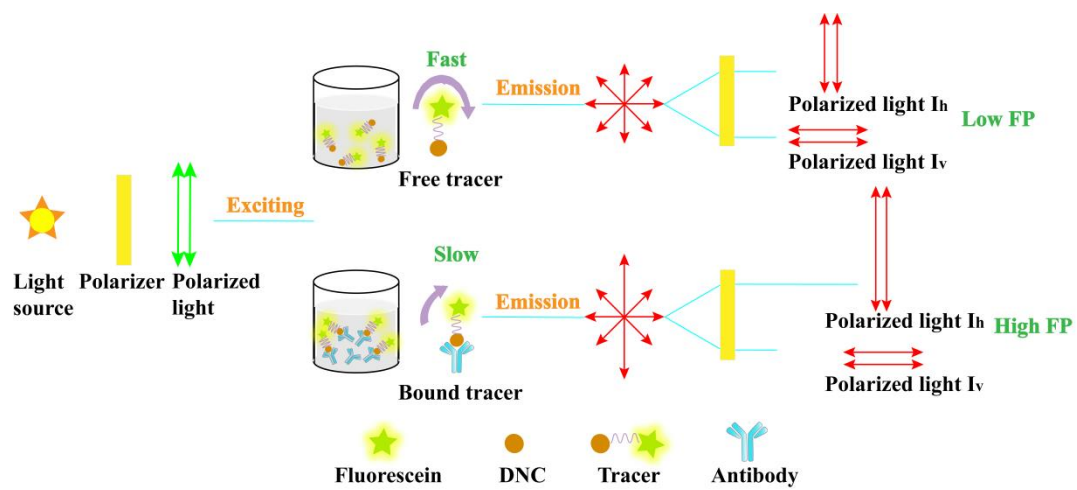

**Figure S2.** Schematic illustrations of the FPIA .

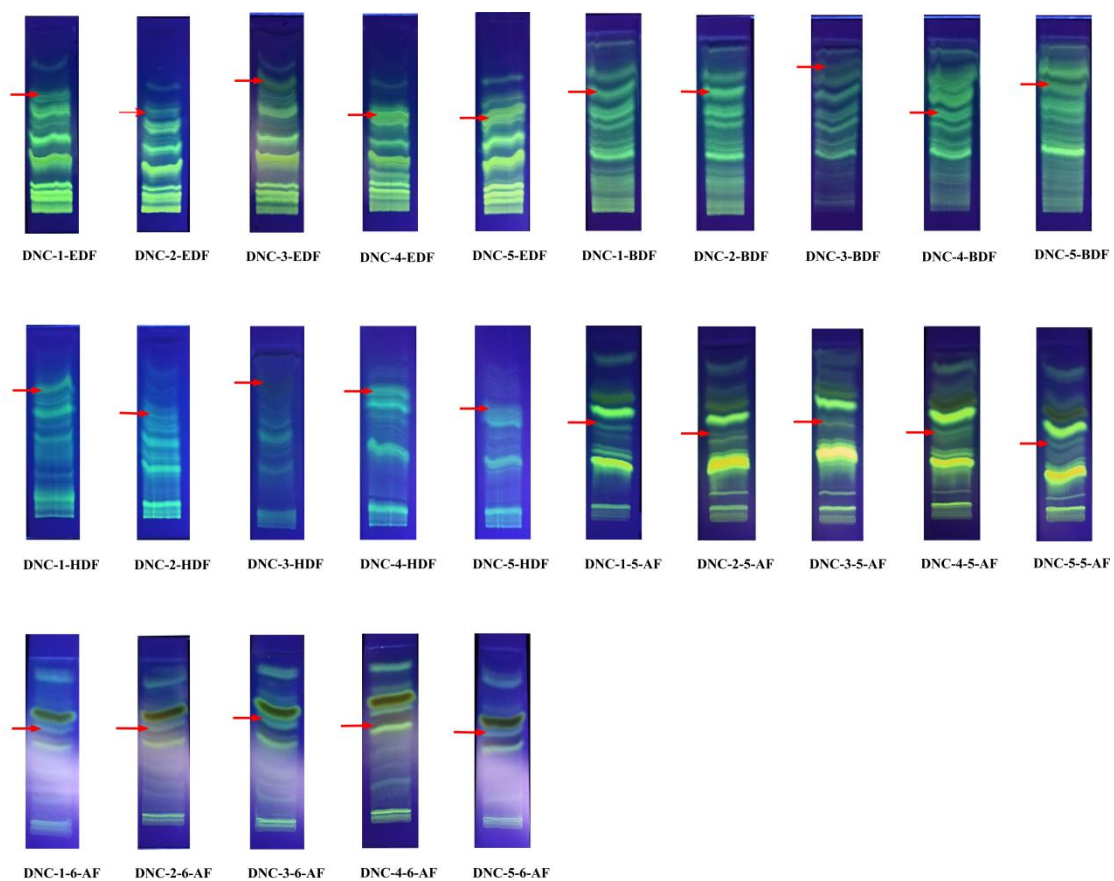

**Figure S3.** The results of TLC for 25 tracers. (The red clip represents the target band that binds to the antibody).

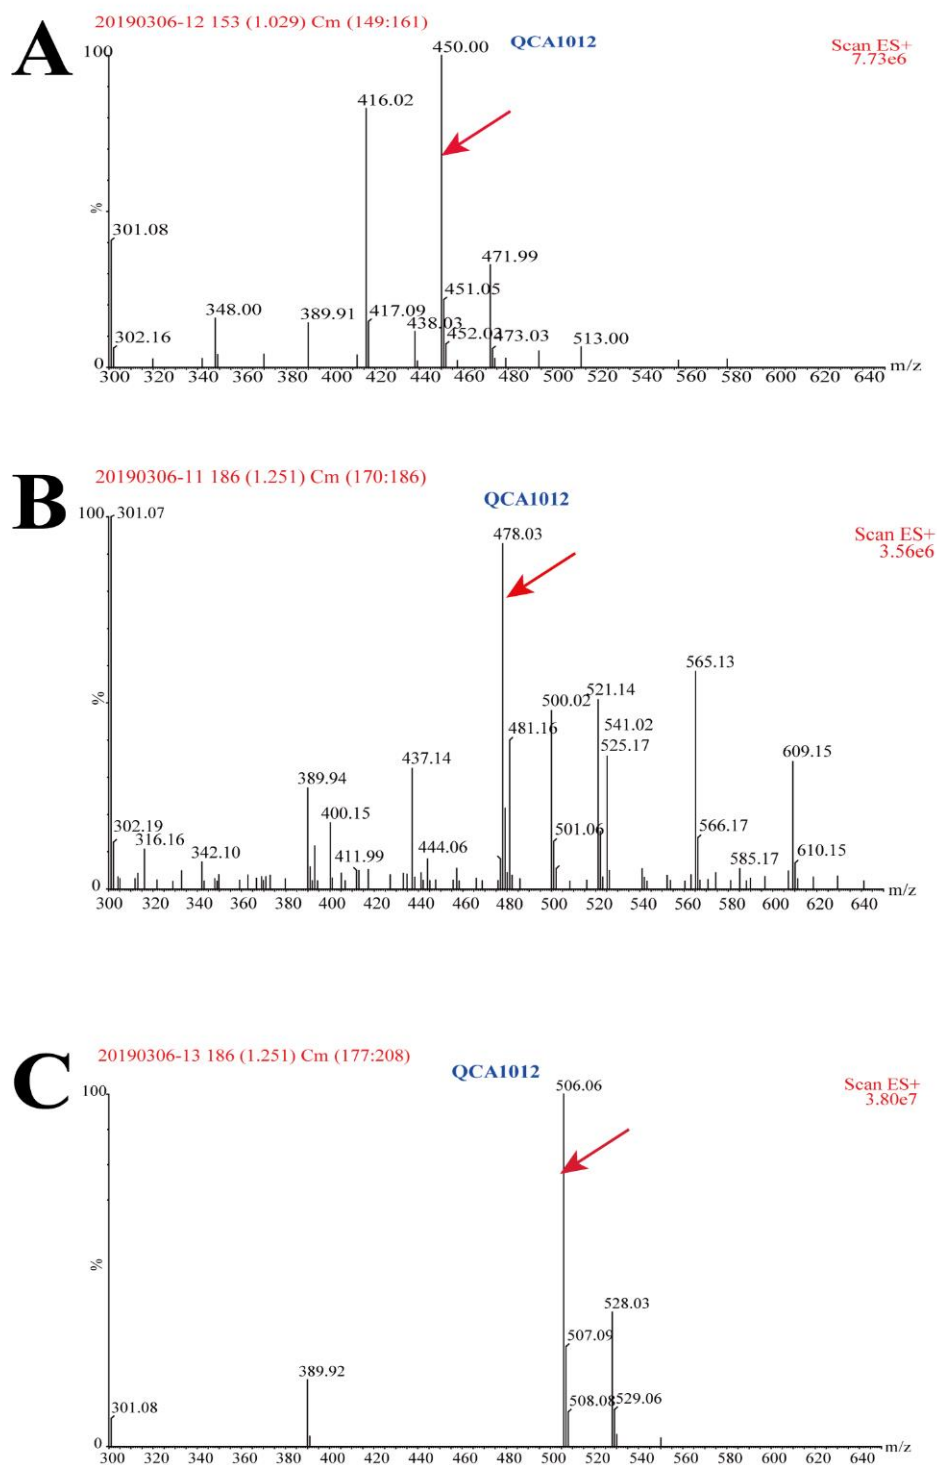

**Figure S4** (A) Mass spectrum of EDF with molecular ion peak  $[M+2H]^{2+}$  (m/z) of 450.00; (B) Mass spectrum of BDF with molecular ion peak  $[M+2H]^{2+}$  (m/z) of 478.03; (C) Mass spectrum of HDF with molecular ion peak  $[M+2H]^{2+}$  (m/z) of 506.06.

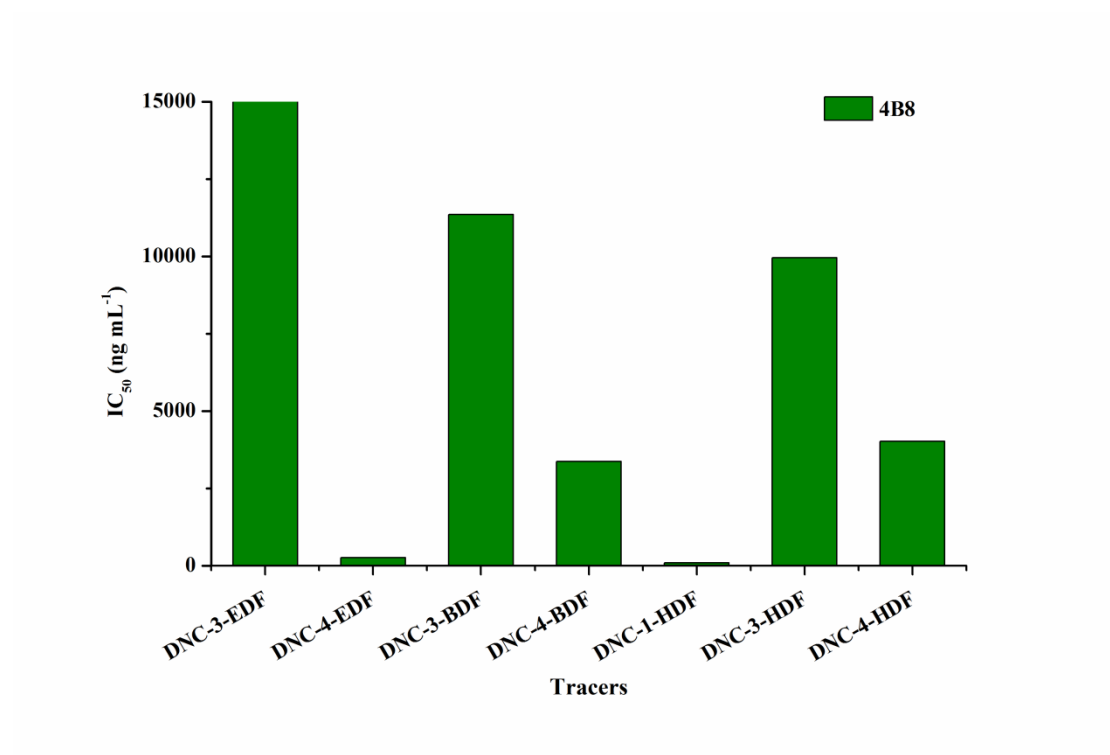

**Figure S5.** Comparison of the effect of homologous and heterologous tracers on sensitivity.
